# Supplementary material
Source: Springer Nature journal article supplement (https://www.springermedizin.de/resource/supplementary/12936_2012_2516_MOESM1_ESM.pdf/9543050)

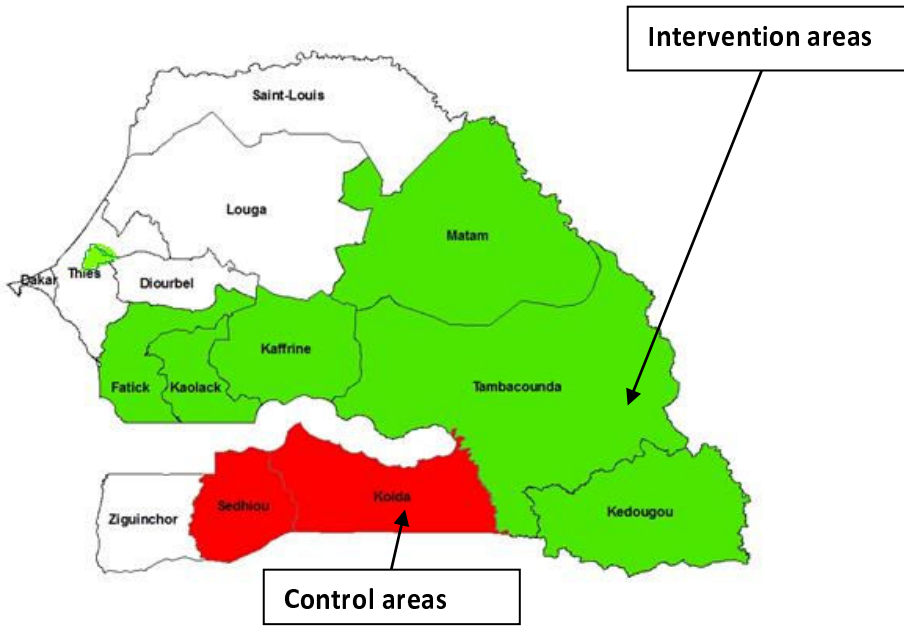

**Intervention areas**

**Control areas**

Supplement: MOESM1 [file 9543050]
